# Supplementary material for: Effects of Mono- and Bifunctional Surface Ligands of Cu–In–Se Quantum Dots on Photoelectrochemical Hydrogen Production
Source: MDPI journal article supplement (doi:10.3390/ma15176010), 2022-08-31
Supplement: s1 [file s1]

# Effects of Mono- and Bifunctional Surface Ligands of Cu-In-Se Quantum Dots on Photoelectrochemical Hydrogen Production

Soo Ik Park <sup>1,†</sup>, Sung-Mok Jung <sup>2,†</sup>, Jae-Yup Kim <sup>2,\*</sup> and Jiwoong Yang <sup>1,3,\*</sup>

<sup>1</sup> Department of Energy Science and Engineering, Daegu Gyeongbuk Institute of Science and Technology (DGIST), Daegu 42988, Republic of Korea

<sup>2</sup> Department of Chemical Engineering, Dankook University, Yongin 16890, Republic of Korea

<sup>3</sup> Energy Science and Engineering Research Center, Daegu Gyeongbuk Institute of Science and Technology (DGIST), Daegu 42988, Republic of Korea

\* Correspondence: jykim@dankook.ac.kr (J.-Y.K.); jiwoongyang@dgist.ac.kr (J.Y.)

† These authors contributed equally to this work.

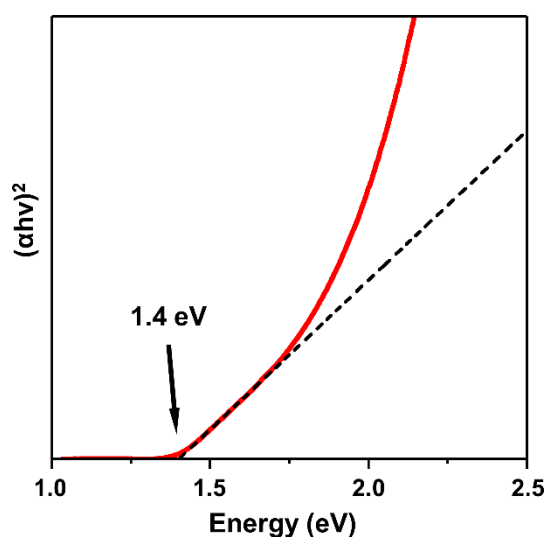

**Figure S1.** Tauc plot of CuInSe QDs. The plot was acquired from the absorption spectrum of CuInSe QDs to determine the bandgap energy.

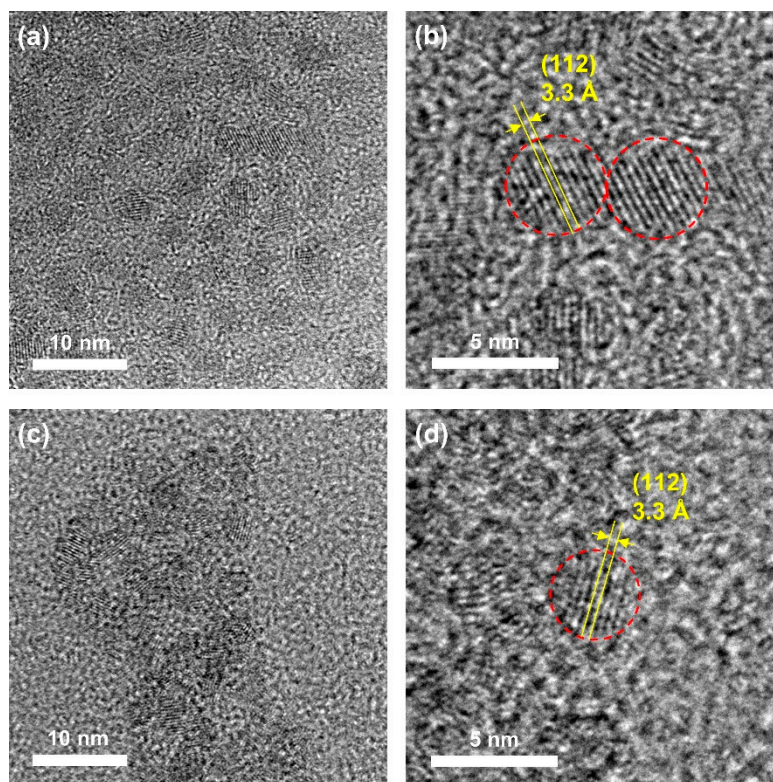

**Figure S2.** TEM analysis of CISe QDs. (a–b) OAm-passivated CISe QDs, and (c–d) MPA-passivated CISe QDs. The OAm- and MPA-passivated CISe QDs present the same size, shape, and crystal structure.

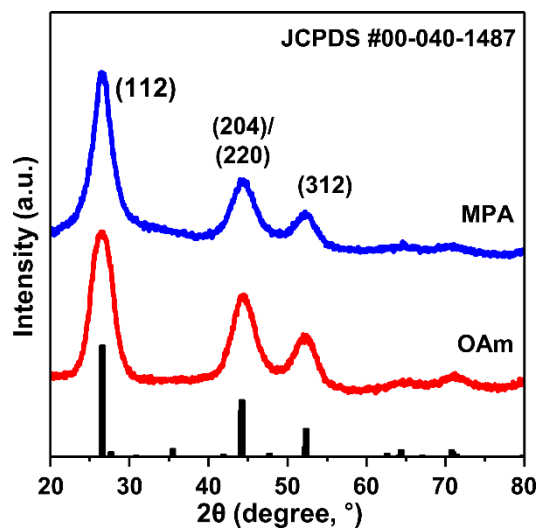

**Figure S3.** The XRD patterns of OAm- and MPA-passivated CISe QDs.

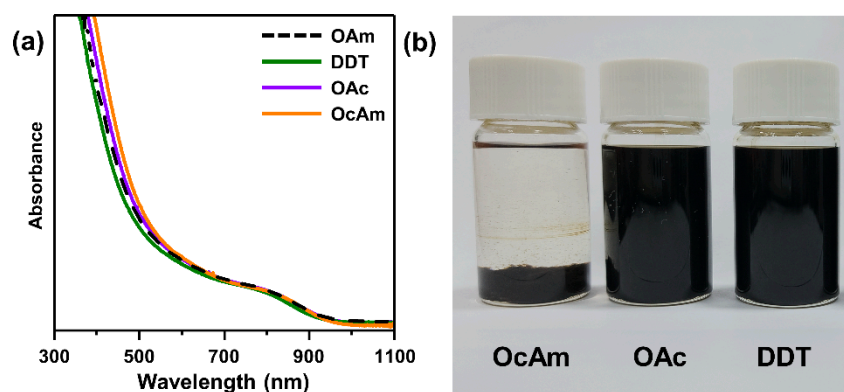

**Figure S4.** (a) Absorption spectra and (b) photographs showing the colloidal solution of OcAm-, DDT-, and OAc-passivated CISE QDs in dichloromethane.

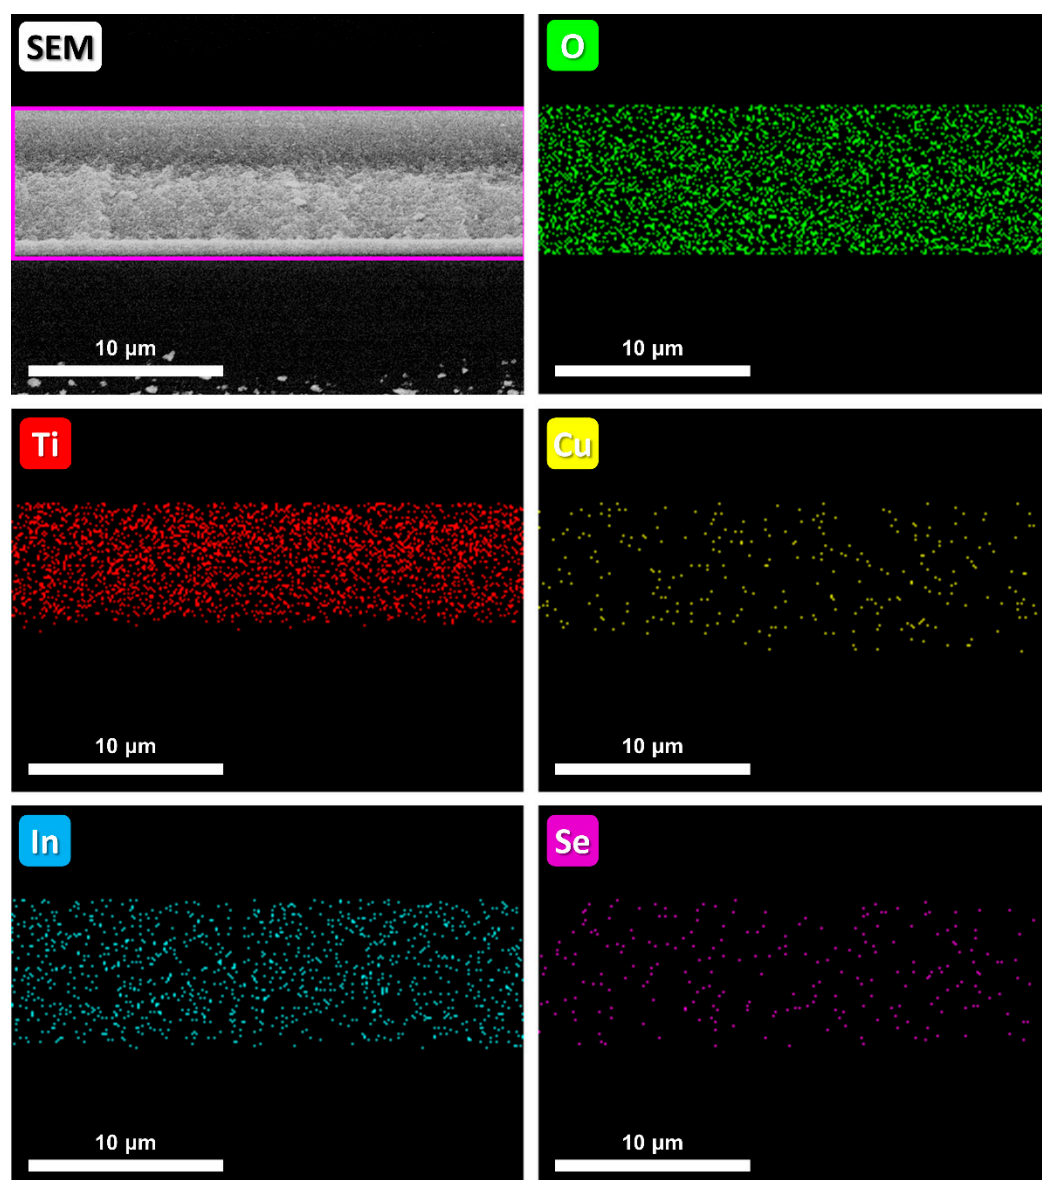

**Figure S5.** Cross-sectional SEM image and the corresponding energy-dispersive spectroscopy (EDS) elemental mapping of an OAm-QD-photoanode.

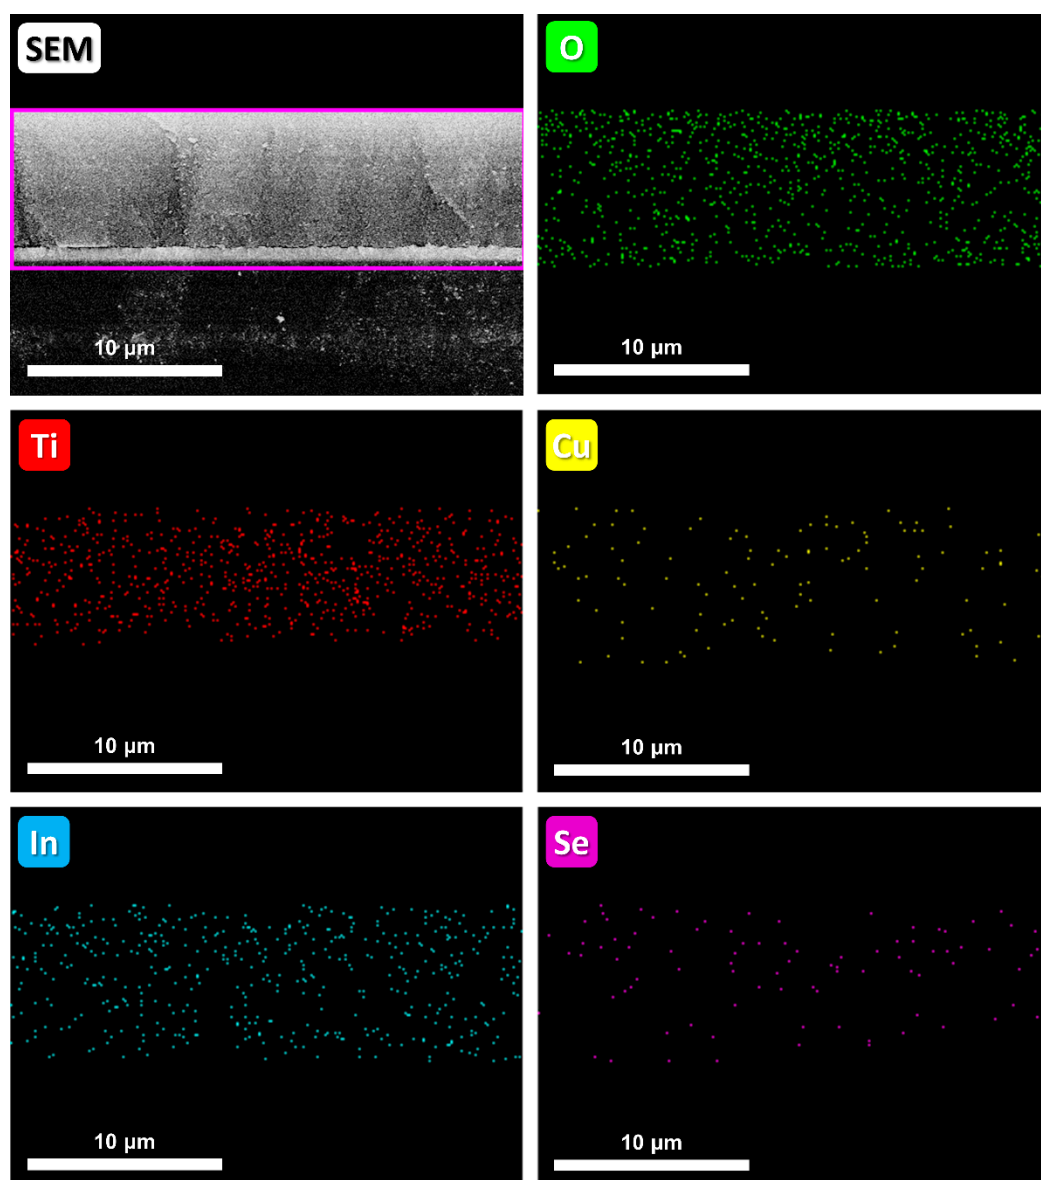

**Figure S6.** Cross-sectional SEM image and the corresponding EDS elemental mapping of an MPA-QD-photoanode.

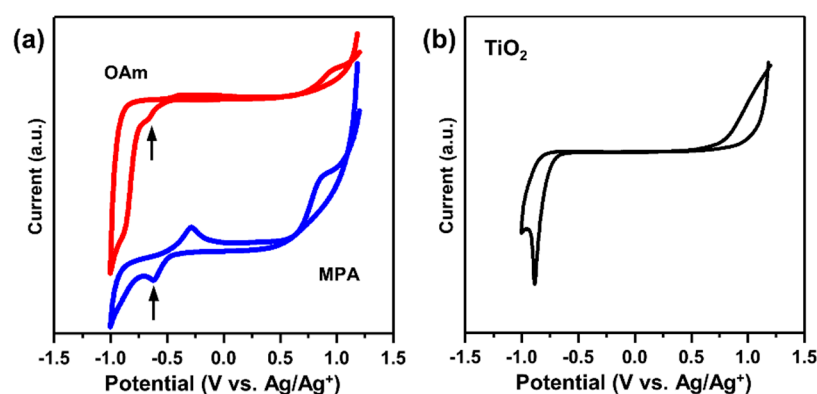

**Figure S7.** (a) Cyclic voltammograms of OAm-QD-photoanodes and MPA-QD-photoanodes. The arrows indicate the first reduction peaks of CISE QDs, which is related to their conduction band minimum. (b) Cyclic voltammogram of bare TiO<sub>2</sub> photoanodes.

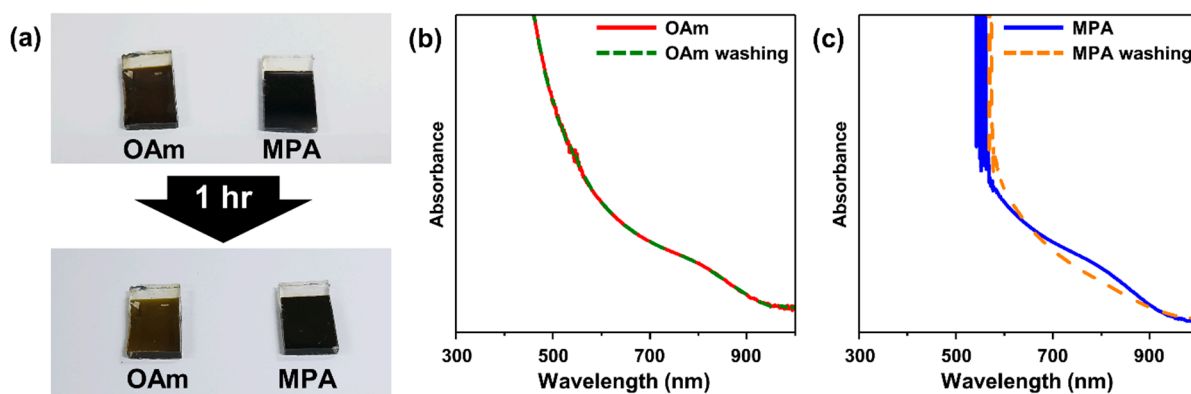

**Figure S8.** (a) Photographs and (b,c) absorption spectra comparing QD sensitized-TiO<sub>2</sub> films before and after the washing (each film was dipped into the original solvent for 1 h).

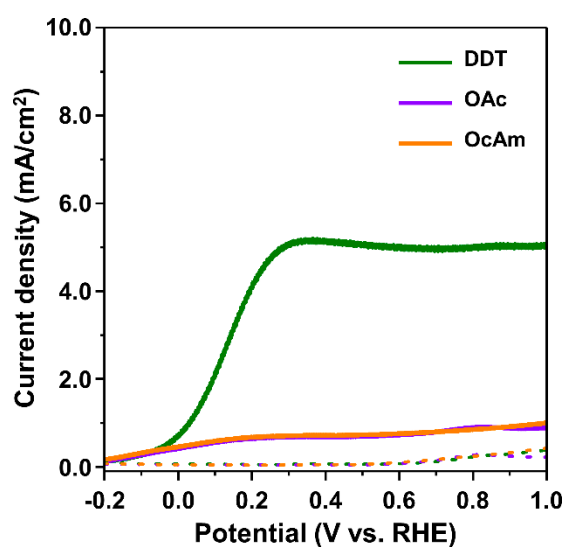

**Figure S9.** *J-V* curves of QD-photoanodes made by OcAm-, DDT-, and OAc-passivated CISE QDs. The data were collected under continuous one sun illumination.

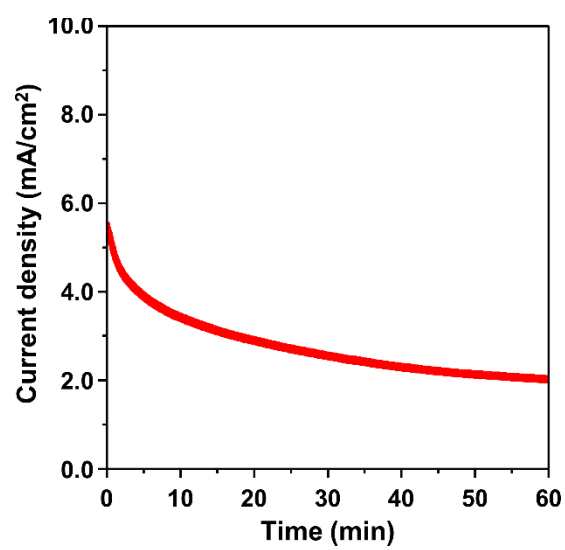

Figure S10.  $J$ - $t$  plot (at 0.6 V<sub>RHE</sub>) of the OAm-QD-photoanodes.
